# Supplementary material
Source: PubMed Central journal article supplement (PMC3084085)
Supplement: 1103329108_pnas.201103329SI.pdf [file 1103329108_pnas.201103329SI.pdf]

# Supporting Information

Avisé and Liu 10.1073/pnas.1103329108

Table S1. Summary statistics of multiple paternity in viviparous mammals

| Species                                                          | # Litters examined | Mean litter size (range) | % Litters with multiple paternity | Mean # mates (range) | Reference |
|------------------------------------------------------------------|--------------------|--------------------------|-----------------------------------|----------------------|-----------|
| Arctic fox, <i>Alopex lagopus</i>                                | 8                  | 5.4                      | 12.5                              | 1.1 (1-2)            | 1         |
| Ethiopian wolf, <i>Canis simensis</i>                            | 12                 | 4.7                      | 33.3                              | 1.3 (1-2)            | 2         |
| African wild dog, <i>Lycaon pictus</i>                           | 6                  | 4.2                      | 16.7                              | 1.2 (1-2)            | 3         |
| Gray fox, <i>Urocyon cinereoargenteus</i>                        | 7                  | 3.3 (2-5)                | 14.3                              | 1.1 (1-2)            | 4         |
| Red fox, <i>Vulpes vulpes</i>                                    | 12                 | 3.8 (2-8)                | 50.0                              | 1.8 (1-4)            | 5         |
| Cheetah, <i>Acinonyx jubatus</i>                                 | 23                 | 3.0 (2-5)                | 43.5                              | 1.5 (1-3)            | 6         |
| Domestic cat, <i>Felis catus</i>                                 | 92                 | 3.8                      | 55.4                              | 1.8 (1-5)            | 7, 8      |
| Spotted hyena, <i>Crocuta crocuta</i>                            | 102                | 2.0                      | 33.3                              | 1.3 (1-2)            | 9,10      |
| Striped hyena, <i>Hyaena hyaena</i>                              | 4                  | 2.5 (2-3)                | 50.0                              | 1.5 (1-2)            | 11        |
| Wolverine, <i>Gulo gulo</i>                                      | 43                 | 2.1 (2-3)                | 0                                 | 1.0                  | 12        |
| European badger, <i>Meles meles</i>                              | 174                | 2.0 (2-4)                | 39.6                              | 1.4 (1-4)            | 13, 14    |
| Stoat, <i>Mustela erminea</i>                                    | 5                  | 8.4 (3-11)               | 20.0                              | 1.2 (1-2)            | 15        |
| American mink, <i>Mustela vison</i>                              | 5                  | 3.6 (2-6)                | 60.0                              | 1.6 (1-2)            | 16        |
| Raccoon, <i>Procyon lotor</i>                                    | 8                  | 4.0 (3-6)                | 87.5                              | 1.9 (1-2)            | 17        |
| American black bear, <i>Ursus americanus</i>                     | 5                  | 2.4                      | 20.0                              | 1.2 (1-2)            | 18        |
| Brown bear, <i>Ursus arctos</i>                                  | 69                 | 2.0                      | 14.5                              | 1.1 (1-2)            | 19        |
| North American Beaver, <i>Castor canadensis</i>                  | 9                  | 3.7                      | 55.6                              | 1.6 (1-2)            | 20        |
| Wild cavy, <i>Cavia aperea</i>                                   | 15                 | 3.9                      | 26.7                              | 1.3 (1-2)            | 21        |
| Prairie vole, <i>Microtus ochrogaster</i>                        | 9                  | 4.8 (3-6)                | 55.6                              | 1.6 (1-2)            | 22        |
| Root vole, <i>Microtus oeconomus</i>                             | 21                 | 5.3                      | 38.1                              | 1.6 (1-3)            | 23        |
| Gray-sided vole, <i>Myodes rufocanus</i>                         | 215                | 4.3                      | 23.2                              | 1.2 (1-3)            | 24        |
| Big-eared woodrat, <i>Neotoma macrotis</i>                       | 25                 | 2.2 (2-3)                | 20.0                              | 1.2 (1-2)            | 25        |
| Canyon mouse, <i>Peromyscus crinitus</i>                         | 10                 | 3.8 (3-5)                | 20.0                              | 1.2 (1-2)            | 26        |
| Striped field mouse, <i>Apodemus agrarius</i>                    | 44                 | 6.5 (5-10)               | 63.6                              | 1.8 (1-3)            | 27,28     |
| Yellow-necked mouse, <i>Apodemus flavicollis</i>                 | 35                 | 5.0                      | 51.4                              | 1.5 (1-2)            | 27,29     |
| Wood mouse, <i>Apodemus sylvaticus</i>                           | 28                 | 4.7 (4-6)                | 64.3                              | 1.7 (1-3)            | 27,28     |
| Ural field mouse, <i>Apodemus uralensis</i>                      | 46                 | 5.0                      | 43.5                              | 1.4 (1-2)            | 27        |
| Natal multimammate mouse <i>Mastomys natalensis</i>              | 36                 | 9.9 (3-16)               | 67.0                              | 1.9 (1-4)            | 30        |
| House mouse, <i>Mus domesticus</i>                               | 143                | 5.6                      | 20.3                              | 1.2 (1-2)            | 31        |
| Red squirrel, <i>Tamiasciurus hudsonicus</i>                     | 44                 | 3.0                      | 72.7                              | 2.0 (1-4)            | 32, 33    |
| Alpine marmot, <i>Marmota marmota</i>                            | 68                 | 3.5                      | 26.5                              | 1.3 (1-2)            | 34        |
| Columbia ground squirrel, <i>Urocitellus columbianus</i>         | 147                | 3.0                      | 57.8                              | 1.8 (1-4)            | 35        |
| Pronghorn antelope, <i>Antilocapra americana</i>                 | 25                 | 2.0                      | 44.0                              | 1.4 (1-2)            | 36        |
| Soay sheep, <i>Ovis aries</i>                                    | 80                 | 2.0                      | 73.8                              | 1.7 (1-2)            | 37        |
| Roe deer, <i>Capreolus capreolus</i>                             | 33                 | 2.1 (2-3)                | 15.5                              | 1.2 (1-2)            | 38        |
| White-tailed deer, <i>Odocoileus virginianus</i>                 | 27                 | 2.1 (2-3)                | 25.9                              | 1.3 (1-2)            | 39        |
| Wild boar, <i>Sus scrofa</i>                                     | 30                 | 4.5 (2-7)                | 10.0                              | 1.1 (1-2)            | 40, 41    |
| Greater white-toothed shrew, <i>Crocidura russula</i>            | 42                 | 2.3                      | 0                                 | 1.0                  | 42        |
| Asian lesser white-toothed shrew, <i>Crocidura shantungensis</i> | 18                 | 3.0 (2-4)                | 27.7                              | 1.3 (1-2)            | 43        |
| Big brown bat, <i>Eptesicus fuscus</i>                           | 26                 | 2.0                      | 46.2                              | 1.5 (1-2)            | 44        |
| European hedgehog, <i>Erinaceus europaeus</i>                    | 5                  | 5.0 (4-7)                | 40.0                              | 1.4 (1-2)            | 45        |
| Snow hare, <i>Lepus americanus</i>                               | 16                 | 4.0                      | 25.0                              | 1.3 (1-2)            | 46        |
| Gray mouse lemur, <i>Microcebus murinus</i>                      | 26                 | 2.0                      | 65.4                              | 1.7 (1-3)            | 47        |
| Large treeshrew, <i>Tupaia tana</i>                              | 9                  | 2.0                      | 33.3                              | 1.3 (1-2)            | 48        |
| Stuart's antechinus, <i>Antechinus stuartii</i>                  | 39                 | 4.4 (2-8)                | 92.3                              | 2.8 (1-4)            | 49        |
| Agile antechinus, <i>Antechinus agilis</i>                       | 47                 | 7.7 (3-10)               | 97.8                              | 2.8 (1-4)            | 50        |
| Virginia opossum, <i>Didelphis virginiana</i>                    | 64                 | 8.7                      | 40.6                              | 1.4 (1-3)            | 51        |
| Spotted-tailed quoll, <i>Dasyurus maculatus</i>                  | 6                  | 5.0 (2-6)                | 66.7                              | 1.8 (1-3)            | 52        |
| Honey possum, <i>Tarsipes rostratus</i>                          | 5                  | 2.4 (2-4)                | 100                               | 2.0                  | 53        |

- Carmichael LE, et al. (2007) Free love in the far north: Plural breeding and polyandry of arctic foxes (*Alopex lagopus*) on Bylot Island, Nunavut. *Can J Zool* 85:338–343.
- Randall DA, et al. (2007) Inbreeding is reduced by female-biased dispersal and mating behavior in Ethiopian wolves. *Behav Ecol* 18:579–589.
- Girman DJ, Mills MGL, Geffen E, Wayne RK (1997) A molecular genetic analysis of social structure, dispersal, and interpack relationships of the African wild dog (*Lycaon pictus*). *Behav Ecol Sociobiol* 40:187–198.
- Glenn JLW, Civitello DJ, Lance SL (2009) Multiple paternity and kinship in the gray fox (*Urocyon cinereoargenteus*). *Mamm Biol* 74:394–402.
- Baker PJ, Funk SM, Bruford MW, Harris S (2004) Polygynandry in a red fox population: Implications for the evolution of group living in canids? *Behav Ecol* 15:766–778.
- Gottelli D, Wang J, Bashir S, Durant SM (2007) Genetic analysis reveals promiscuity among female cheetahs. *Proc Biol Sci* 274:1993–2001.
- Natol E, Schmid M, Say L, Pontier D (2007) Male reproductive success in a social group of urban feral cats (*Felis catus* L.). *Ethology* 113:283–289.

8. Say L, Pontier D, Natoli E (1999) High variation in multiple paternity of domestic cats (*Felis catus* L.) in relation to environmental conditions. *Proc Biol Sci* 266:2071–2074.
9. Engh AL, et al. (2002) Reproductive skew among males in a female-dominated mammalian society. *Behav Ecol* 13:193–200.
10. East ML, Burke T, Wilhelm K, Greig C, Hofer H (2003) Sexual conflicts in spotted hyenas: Male and female mating tactics and their reproductive outcome with respect to age, social status and tenure. *Proc Biol Sci* 270:1247–1254.
11. Wagner AP, Creel S, Frank LG, Kalinowski ST (2007) Patterns of relatedness and parentage in an asocial, polyandrous striped hyena population. *Mol Ecol* 16:4356–4369.
12. Hedmark E, Persson J, Segerström P, Landa A, Ellegren H (2007) Paternity and mating system in wolverines *Gulo gulo*. *Wildl Biol* 13(S2):13–30.
13. Dugdale HL, Macdonald DW, Pope LC, Burke T (2007) Polygynandry, extra-group paternity and multiple-paternity litters in European badger (*Meles meles*) social groups. *Mol Ecol* 16:5294–5306.
14. Carpenter PJ, et al. (2005) Mating system of the Eurasian badger, *Meles meles*, in a high density population. *Mol Ecol* 14:273–284.
15. Holland OJ, Gleason DM (2005) Genetic characterization of blastocysts and the identification of an instance of multiple paternity in the stoat (*Mustela erminea*). *Conserv Genet* 6:855–858.
16. Yamaguchi N, Sarno RJ, Johnson WE, O'Brien SJ, Macdonald DW (2004) Multiple paternity and reproductive tactics of free-ranging American minks, *Mustela vison*. *J Mammal* 85:432–439.
17. Nielsen CLR, Nielsen CK (2007) Multiple paternity and relatedness in southern Illinois raccoons (*Procyon lotor*). *J Mammal* 88:441–447.
18. Onorato DP, Hellgren EC, Van Den Bussche RA, Skiles JR (2004) Paternity and relatedness of American black bears recolonizing a desert montane island. *Can J Zool* 82:1201–1210.
19. Bellemain E, Swenson JE, Taberlet P (2006) Mating strategies in relation to sexually selected infanticide in a non-social carnivore: The brown bear. *Ethology* 112:238–246.
20. Crawford JC, Liu Z, Nelson TA, Nelson CK, Bloomquist CK (2008) Microsatellite analysis of mating and kinship in beavers (*Castor canadensis*). *J Mammal* 89:575–581.
21. Asher M, et al. (2008) Large males dominate: Ecology, social organization, and mating system of wild cavies, the ancestors of the guinea pig. *Behav Ecol Sociobiol* 62:1509–1521.
22. Solomon NG, Keane B, Knoch LR, Hogan PJ (2004) Multiple paternity in socially monogamous prairie voles (*Microtus ochrogaster*). *Can J Zool* 82:1667–1671.
23. Borkowska A, Borowski Z, Krysiuk K (2009) Multiple paternity in free-living root voles (*Microtus oeconomus*). *Behav Processes* 82:211–213.
24. Ishibashi Y, Saitoh T (2008) Effect of local density of males on the occurrence of multimale mating in gray-sided voles (*Myodes rufocanus*). *J Mammal* 89:388–397.
25. Matocq MD (2004) Reproductive success and effective population size in woodrats (*Neotoma macrotis*). *Mol Ecol* 13:1635–1642.
26. Shurtliff QR, Pearse DE, Rogers DS (2005) Parentage analysis of the canyon mouse (*Peromyscus crinitus*): Evidence for multiple paternity. *J Mammal* 86:531–540.
27. Bryja J, et al. (2008) Varying levels of female promiscuity in four *Apodemus* mice species. *Behav Ecol Sociobiol* 63:251–260.
28. Baker RJ, Makova KD, Chesser RK (1999) Microsatellites indicate a high frequency of multiple paternity in *Apodemus* (Rodentia). *Mol Ecol* 8:107–111.
29. Gryczyńska-Sięmiątkowska A, et al. (2008) Multiple paternity in a wild population of the yellow-necked mouse *Apodemus flavicollis*. *Acta Ther* 53:251–258.
30. Kennis J, Sluydts V, Leirs H, van Hooft WF (2008) Polyandry and polygyny in an African rodent species, *Mastomys natalensis*. *Mammalia* 72:150–160.
31. Dean MD, Ardlie KG, Nachman MW (2006) The frequency of multiple paternity suggests that sperm competition is common in house mice (*Mus domesticus*). *Mol Ecol* 15:4141–4151.
32. Lane JE, Boutin S, Gunn MR, Slate J, Coltman DW (2008) Female multiple mating and paternity in free-ranging North American red squirrels. *Anim Behav* 75:1927–1937.
33. Bonnano VL, Schulte-Hostedde AI (2009) Sperm competition and ejaculate investment in red squirrels (*Tamiasciurus hudsonicus*). *Behav Ecol Sociobiol* 63:835–846.
34. Cohas A, Yoccoz NG, Da Silva A, Goossens B, Allaine D (2006) Extra-pair paternity in the monogamous alpine marmot (*Marmota marmota*): The roles of social setting and female mate choice. *Behav Ecol Sociobiol* 59:597–605.
35. Raveh S, et al. (2010) Mating order and reproductive success in male Columbia ground squirrels (*Urocyon columbianus*). *Behav Ecol* 21:537–547.
36. Carling MD, Wiseman PA, Byers JA (2003) Microsatellite analysis reveals multiple paternity in a population of wild pronghorn antelopes (*Antilocapra americana*). *J Mammal* 84:1237–1243.
37. Pemberton JM, Coltman DW, Smith JA, Pilkington JG (1999) Molecular analysis of a promiscuous, fluctuating mating system. *Biol J Linn Soc* 68:289–301.
38. Vanpé C, et al. (2009) Multiple paternity occurs with low frequency in the territorial roe deer, *Capreolus capreolus*. *Biol J Linn Soc Lond* 97:128–139.
39. Sorin AB (2004) Paternity assignment for white-tailed deer (*Odocoileus virginianus*): Mating across age classes and multiple paternity. *J Mammal* 85:356–362.
40. Poteaux C, et al. (2009) Socio-genetic structure and mating system of a wild boar population. *J Zool (Lond)* 278:116–125.
41. Delgado R, Fernández-Llario P, Azevedo M, Beja-Pereira A, Santos P (2008) Paternity assessment in free-ranging wild boar (*Sus scrofa*)—Are littermates full-sibs? *Mamm Biol* 73:169–176.
42. Bouteiller C, Perrin N (2000) Individual reproductive success and effective population size in the greater white-toothed shrew *Crocodyra russula*. *Proc Biol Sci* 267:701–705.
43. Lin TT, You EM, Lin YK (2009) Social and genetic mating systems of the Asian lesser white-toothed shrew, *Crocodyra shantungensis*, in Taiwan. *J Mammal* 90:1370–1380.
44. Vonhof MJ, Barber D, Fenton MB, Strobeck C (2006) A tale of two siblings: Multiple paternity in big brown bats (*Eptesicus fuscus*) demonstrated using microsatellite markers. *Mol Ecol* 15:241–247.
45. Moran S, Turner PD, O'Reilly C (2009) Multiple paternity in the European hedgehog. *J Zool (Lond)* 278:349–353.
46. Burton C (2002) Microsatellite analysis of multiple paternity and male reproductive success in the promiscuous snowshoe hare. *Can J Zool* 80:1948–1956.
47. Eberle M, Kappeler PM (2004) Selected polyandry: Female choice and inter-sexual conflict in a small nocturnal solitary primate (*Microcebus murinus*). *Behav Ecol Sociobiol* 57:91–100.
48. Munshi-South J (2007) Extra-pair paternity and the evolution of testis size in a behaviorally monogamous tropical mammal, the large treeshrew (*Tupaia tana*). *Behav Ecol Sociobiol* 62:201–212.
49. Holleley CE, Dickman CR, Crowther MS, Oldroyd BP (2006) Size breeds success: Multiple paternity, multivariate selection and male semelparity in a small marsupial, *Antechinus stuartii*. *Mol Ecol* 15:3439–3448.
50. Kraaijeveld-Smit FJL, Ward SJ, Temple-Smith PD (2002) Multiple paternity in a field population of a small carnivorous marsupial, the agile antechinus, *Antechinus agilis*. *Behav Ecol Sociobiol* 52:84–91.
51. Beasley JC, Beatty WS, Olson ZH, Rhodes OE Jr. (2010) A genetic analysis of the Virginia opossum mating system: Evidence of multiple paternity in a highly fragmented landscape. *J Hered* 101:368–373.
52. Glen AS, Cardoso MJ, Dickman CR, Firestone KB (2009) Who's your daddy? Paternity testing reveals promiscuity and multiple paternity in the carnivorous marsupial *Dasyurus maculatus* (Marsupialia: Dasyuridae). *Biol J Linn Soc Lond* 96:1–7.
53. Wooller RD, Richardson KC, Garavanta CAM, Saffer VM, Bryant KA (2000) Opportunistic breeding in the polyandrous honey possum, *Tarsipes rostratus*. *Aust J Zool* 48:669–680.

**Table S2. Summary statistics of multiple paternity in live-bearing amphibians and reptiles**

| Species                                                    | # Clutches examined | Mean clutch size (range) | % Clutches with multiple paternity | Mean # of mates (range) | Reference |
|------------------------------------------------------------|---------------------|--------------------------|------------------------------------|-------------------------|-----------|
| White's skink, <i>Egernia whitii</i>                       | 43                  | 2.5 (1-4)                | 11.6                               | 1.1 (1-2)               | 1         |
| Spiny-tailed skink, <i>Egernia stokesii</i>                | 16                  | 4.2 (1-7)                | 25.0                               | 1.3 (1-2)               | 2         |
| Cunningham's skink, <i>Egernia cunninghami</i>             | 38                  | 3.4 (2-7)                | 2.6                                | 1.0 (1-2)               | 3         |
| Southern water skink, <i>Eulamprus heatwolei</i>           | 17                  | 3.2 (2-5)                | 64.7                               | 1.7 (1-3)               | 4         |
| Southern snow skink, <i>Niveoscincus microlepidotus</i>    | 8                   | 2.3 (2-4)                | 75.0                               | N/A                     | 5         |
| Spotted snow skink <i>Niveoscincus ocellatus</i>           | 16                  | 1.8                      | 93.8                               | N/A                     | 6         |
| Mt log skink, <i>Pseudomoia eurecateui</i>                 | 11                  | 2.6 (2-3)                | 27.3                               | 1.3 (1-2)               | 7         |
| Sleepy lizard, <i>Tiliqua rugosa</i>                       | 17                  | 2.0 (1-3)                | 23.5                               | 1.2 (1-2)               | 8         |
| Common lizard, <i>Lacerta vivipara</i>                     | 58                  | 5.6                      | 63.8                               | 1.7 (1-3)               | 9         |
| Northern water snake, <i>Nerodia sipedon</i>               | 45                  | 18.0 (5-28)              | 58.0                               | 1.8 (1-5)               | 10        |
| Garter snake, <i>Thamnophis sirtalis</i>                   | 28                  | 9.6 (3-21)               | 57.8                               | 1.7 (1-3)               | 11-13     |
| Western garter snake, <i>Thamnophis elegans</i>            | 6                   | 13.8 (8-24)              | 50.0                               | 1.7 (1-3)               | 14        |
| Common European adder, <i>Vipera berus</i>                 | 13                  | 7.7 (2-13)               | 69.2                               | 2.2 (1-4)               | 15        |
| Rainbow mud snake, <i>Enhydryis enhydryis</i>              | 2                   | 32.5 (29-36)             | 100                                | 4.0 (3-5)               | 16        |
| Mekong mud snake, <i>Enhydryis subtaeniata</i>             | 4                   | 18.5 (14-25)             | 100                                | 4.3 (3-5)               | 16        |
| Broods of 7 watersnake species (Homalopsidae)              | 7                   | 15.1 (6-30)              | 85.7                               | 2.0 (1-3)               | 17        |
| Broods of 5 <i>Hydrophis</i> and 1 <i>Lapenmis</i> species | 12                  | 6.4 (4-18)               | 0                                  | 1.0                     | 18        |
| Fire salamander, <i>Salamandra salamandra</i>              | 21                  | 22.8 (9-41)              | 52.4                               | 1.7 (1-3)               | 19        |

- Chapple DG, Keogh JS (2005) Complex mating system and dispersal patterns in a social lizard, *Egernia whitii*. *Mol Ecol* 14:1215-1227.
- Gardner MG, Bull CM, Cooper SJB, Duffield GA (2002) High levels of genetic monogamy in the group-living Australian lizard *Egernia stokesii*. *Mol Ecol* 11:1787-1794.
- Stow AJ, Sunnucks P (2004) High mate and site fidelity in Cunningham's skinks (*Egernia cunninghami*) in natural and fragmented habitat. *Mol Ecol* 13:419-430.
- Morrison SF, Keogh JS, Scott IA (2002) Molecular determination of paternity in a natural population of the multiply mating polygynous lizard *Eulamprus heatwolei*. *Mol Ecol* 11:535-545.
- Olsson M, et al. (2005) Does mate guarding prevent rival mating in snow skink lizards? A test using AFLP. *Herpetologica* 61:389-394.
- Atkins N (2007) Parental effects in two species of viviparous lizards: *Niveoscincus microlepidotus* and *N. ocellatus*. PhD thesis, (University of Tasmania).
- Stapley J, Keogh JS (2006) Experimental and molecular evidence that body size and ventral colour interact to influence male reproductive success in a lizard. *Ethol Ecol Evol* 18:275-288.
- Bull CM, Cooper SJB, Baghurst BC (1998) Social monogamy and extra-pair fertilization in an Australian lizard, *Tiliqua rugosa*. *Behav Ecol Sociobiol* 44:63-72.
- Laloi D, Richard M, Lecomte J, Massot M, Clobert J (2004) Multiple paternity in clutches of common lizard *Lacerta vivipara*: data from microsatellite markers. *Mol Ecol* 13:719-723.
- Prosser MR, Weatherhead PJ, Gibbs HL, Brown GP (2002) Genetic analysis of the mating system and opportunity for sexual selection in northern water snakes (*Nerodia sipedon*). *Behav Ecol* 13:800-807.
- McCracken GF, Burghardt GM, Houts SE (1999) Microsatellite markers and multiple paternity in the garter snake *Thamnophis sirtalis*. *Mol Ecol* 8:1475-1479.
- Garner TWJ, et al. (2002) Geographic variation of multiple paternity in the common garter snake (*Thamnophis sirtalis*). *Copeia* 2002:15-23.
- King RB, et al. (2001) Application of microsatellite DNA markers to discriminate between maternal and genetic effects on scalation and behavior in multiply-sired garter snake litters. *Can J Zool* 79:121-128.
- Garner TWJ, Larsen KW (2005) Multiple paternity in the western terrestrial garter snake, *Thamnophis elegans*. *Can J Zool* 83:656-663.
- Ursenbacher S, Erny C, Fumagalli L (2009) Male reproductive success and multiple paternity in wild, low-density populations of the adder (*Vipera berus*). *J Hered* 100:365-370.
- Voris HK, Karns DR, Feldheim KA, Kechavarzi B, Rinehart M (2008) Multiple paternity in the Oriental-Australian rear-fanged watersnakes (Homalopsidae). *Herpetol Conserv Biol* 3:88-102.
- Wusterbarth TL, King RB, Duvall MR, Grayburn WS, Burghardt GM (2010) Phylogenetically widespread multiple paternity in new world natricine snakes. *Herpetol Conserv Biol* 5:86-93.
- Lukoscsek V, Avise JC (2011) Genetic monandry in six viviparous species of true sea snakes. *J Hered*, in press.
- Steinfartz S, Stemshorn K, Kuesters D, Tautz D (2006) Patterns of multiple paternity within and between annual reproduction cycles of the fire salamander (*Salamandra salamandra*) under natural conditions. *J Zool (Lond)* 268:1-8.
